## Dopaminergic drug effects on probability weighting

# 1            **Dopaminergic drug effects on probability weighting during risky decision-making**

2            Abbreviated Title: Dopaminergic drug effects on probability weighting

3  
4            Karita E. Ojala<sup>1</sup>, Lieneke K. Janssen<sup>1</sup>, Mahur M. Hashemi<sup>1</sup>, Monique H. M. Timmer<sup>1,2</sup>, Dirk E. M. Geurts<sup>1,3</sup>,  
5            Niels P. ter Huurne<sup>1,4</sup>, Roshan Cools<sup>1,3</sup>, Guillaume Sescousse<sup>1</sup>

6  
7            <sup>1</sup>Donders Institute for Brain, Cognition and Behaviour, Radboud University, Nijmegen, the Netherlands

8            <sup>2</sup>Department of Neurology, Radboud University Medical Centre, Nijmegen, the Netherlands

9            <sup>3</sup>Department of Psychiatry, Radboud University Medical Centre, Nijmegen, the Netherlands

10           <sup>4</sup>Karakter Child and Adolescent Psychiatry University Centre, Nijmegen, the Netherlands

11  
12           **Author contributions:** R.C. and G.S. designed research, L.K.J., M.H., M.H.M.T., D.E.M.G., N.P.H. and G.S.  
13           performed research, K.E.O. and G.S. analysed the data, and K.E.O, R.C. and G.S. wrote the paper.

### 14           **Corresponding authors:**

15           Karita E. Ojala  
16           Division of Clinical Psychiatry Research  
17           Psychiatric Hospital, University of Zurich  
18           Lenggstrasse 31, 8032 Zurich  
19           Switzerland  
20           karita.ojala@uzh.ch

21  
22           Guillaume Sescousse  
23           Donders Centre for Cognitive Neuroimaging  
24           PO Box 9101, 6500 HB Nijmegen  
25           The Netherlands  
26           g.sescousse@donders.ru.nl

27  
28           Figures (3), Tables (3)  
29           Words: Abstract (222), Significance Statement (120), Introduction (735), Discussion (1573)

30  
31           **Acknowledgements:** We would like to thank Romain Ligneul, Payam Piray, Bram Zandbelt and Filip  
32           Melinščak for helpful discussions on data analysis and visualization.

33           **Conflict of interest:** Authors report no conflict of interest.

34           **Funding sources:** GS was supported by a Veni grant from the Netherlands Organisation for Scientific  
35           Research (NWO).

36           **Current author affiliations:** Karita E. Ojala: Division of Clinical Psychiatry Research, Psychiatric University  
37           Hospital, University of Zurich, Zurich, Switzerland. Lieneke K. Janssen: Department of Neurology, Max  
38           Planck Institute for Human Cognitive and Brain Sciences; Leipzig University Medical Center, IFB Adiposity  
39           Diseases, Leipzig, Germany.

40

## Dopaminergic drug effects on probability weighting

### 41 **Abstract**

42 Dopamine has been associated with risky decision-making, as well as with pathological gambling, a  
43 behavioural addiction characterized by excessive risk-taking behaviour. However, the specific  
44 mechanisms through which dopamine might act to foster risk-taking and pathological gambling remain  
45 elusive. Here we test the hypothesis that this might be achieved, in part, via modulation of subjective  
46 probability weighing during decision-making. Healthy controls ( $n = 21$ ) and pathological gamblers ( $n = 16$ )  
47 played a decision-making task involving choices between sure monetary options and risky gambles both  
48 in the gain and loss domains. Each participant played the task twice, either under placebo or the  
49 dopamine  $D_2/D_3$  receptor antagonist sulpiride, in a double-blind, counter-balanced, design. A prospect  
50 theory modelling approach was used to estimate subjective probability weighting and sensitivity to  
51 monetary outcomes. Consistent with prospect theory, we found that participants presented a distortion  
52 in the subjective weighting of probabilities, i.e. they overweighted low probabilities and underweighted  
53 moderate to high probabilities, both in the gain and loss domains. Compared with placebo, sulpiride  
54 attenuated this distortion in the gain domain. Across drugs, the groups did not differ in their probability  
55 weighting, although in the placebo condition, gamblers consistently underweighted losing probabilities.  
56 Overall, our results reveal that dopamine  $D_2/D_3$  receptor antagonism modulates the subjective weighting  
57 of probabilities in the gain domain, in the direction of more objective, economically rational decision-  
58 making.

59

### 60 **Significance statement**

61 Dopamine has been implicated in risky decision-making and gambling addiction, but the exact  
62 mechanisms underlying this influence remain partly elusive. Here we tested the hypothesis that  
63 dopamine modulates subjective probability weighting, by examining the effect of a dopaminergic drug  
64 on risk-taking behaviour, both in healthy individuals and pathological gamblers. We found that  
65 selectively blocking dopamine  $D_2/D_3$  receptors diminished the typically observed distortion of winning  
66 probabilities, characterized by an overweighting of low probabilities and underweighting of high  
67 probabilities. This made participants more linear in their subjective estimation of probabilities, and thus  
68 more rational in their decision-making behaviour. Healthy participants and pathological gamblers did not  
69 differ in their risk-taking behaviour, except in the placebo condition in which gamblers consistently  
70 underweighted losing probabilities.

## Dopaminergic drug effects on probability weighting

### 71 **Introduction**

72 A wealth of animal and human studies has implicated dopamine in risk-taking behaviour.  
73 Pharmacological studies in rodents have shown that drugs blocking dopamine  $D_1$  and  $D_{2/3}$  receptors  
74 generally decrease risk-taking, whereas drugs enhancing dopamine  $D_1$  and  $D_{2/3}$  receptor activity generally  
75 increase risk-taking (Zeeb et al., 2009; St Onge and Floresco, 2009; St Onge et al., 2010; Barrus and  
76 Winstanley, 2016). Similarly, in humans, boosting dopaminergic transmission with drugs such as L-Dopa  
77 and  $D_{2/3}$  receptor agonists has been shown to increase risk-taking behaviour (Riba et al., 2008; Rutledge  
78 et al., 2015; Rigoli et al., 2016; Djamshidian et al., 2010; Voon et al., 2011). Furthermore, studies in both  
79 human and animals have reported that variations in dopamine levels due to genetic manipulations or  
80 natural variations in the expression of the dopamine transporter are associated with changes in risk  
81 preferences (Mata et al., 2012; van Enkhuizen et al., 2014). Yet, the specific neurocognitive mechanisms  
82 through which increased dopaminergic transmission would increase risk-taking behaviour remain partly  
83 elusive. Some studies have suggested an influence via reward valuation mechanisms (Zhong et al., 2009)  
84 while other studies have shown that this influence is exerted via a change in value-independent  
85 gambling propensity (Rigoli et al., 2016; Rutledge et al., 2015; Timmer et al., 2017). Here we focus on a  
86 less well-investigated hypothesis, which is the role of dopamine on the subjective weighting of  
87 probabilities, both in healthy participants and individuals suffering from pathological gambling, a  
88 psychiatric disorder characterized by excessive risk-taking.

89 A useful and popular framework for examining how dopamine influences probability weighting is  
90 prospect theory (Kahneman and Tversky, 1979). Prospect theory posits that the departure of human  
91 agents from rational economic decision-making (i.e., expected value maximization) results from  
92 diminishing sensitivity to outcome value on the one hand, and non-linear weighting of probabilities on  
93 the other hand. People typically overweight low probabilities and underweight moderate to high  
94 probabilities, which results in an inverted-S-shaped probability weighting function and a diminished  
95 sensitivity to changes in probabilities in the medium range (Fig. 1B). A previous PET study in humans has  
96 shown that the degree of non-linear probability weighting in the gain domain is correlated with striatal  
97 dopamine  $D_1$  receptor availability across subjects (Takahashi et al., 2010). Work with fMRI has also  
98 shown that probability distortion is accompanied by similarly distorted patterns of striatal BOLD activity  
99 (Hsu et al., 2009). Here, we aimed to establish a causal link between dopamine and probability distortion  
100 using a pharmacological manipulation.

101 Dopamine has been linked to pathological gambling (PG, also called gambling disorder), an  
102 addictive disorder characterized by excessive financial risk-taking in the face of negative consequences.

## Dopaminergic drug effects on probability weighting

103 Initial evidence came from the clinical observation that a subset of patients with Parkinson's disease  
104 develop PG symptoms after receiving dopaminergic replacement therapy, in particular dopamine D<sub>2</sub>/D<sub>3</sub>  
105 receptor agonists with high affinity for D<sub>3</sub> receptors (Voon et al., 2009; Seeman 2015). This concurs with  
106 recent evidence showing that PG is characterized by a hyper-dopaminergic state (Boileau et al., 2014;  
107 van Holst et al., 2017), and the prominent role of dopamine D<sub>3</sub> receptors in human and rat models of PG  
108 (Lobo et al., 2014; Payer et al., 2013). However, the specific mechanisms through which dopamine D<sub>2/3</sub>  
109 receptor activity may act to foster PG remain elusive. In our previous study (Ligneul et al., 2013),  
110 pathological gamblers showed an elevation in their probability weighting function compared with  
111 healthy controls, reflecting an increased preference for risk or “optimism bias” in the gain domain  
112 (Gonzalez and Wu, 1999). Based on this observation, we aimed to test whether sulpiride, a selective  
113 dopamine D<sub>2</sub>/D<sub>3</sub> receptor antagonist, could normalize risk-taking behaviour in pathological gamblers, by  
114 decreasing the elevation of subjective probability weighting.

115 In order to test the above hypotheses, we conducted a pharmaco-behavioural study using a  
116 within-subject, counter-balanced design. Pathological gamblers and healthy controls were asked to make  
117 choices between safe and risky options, both under placebo and sulpiride. We used prospect theory  
118 modelling to estimate subjective probability weighting and sensitivity to outcome value, separately in  
119 the gain and loss domains. Our main objective was to assess the effect of sulpiride on the two main  
120 characteristics of the probability weighting function, i.e. non-linear distortion (sensitivity to changes in  
121 probability) and elevation (optimism bias). At a more exploratory level, we were also interested in  
122 comparing those effects in the gain and loss domains, given extensive literature showing differential  
123 effects of dopamine on gains versus losses (Frank et al., 2004; Pessiglione et al., 2006).

124

## 125 **Materials and Methods**

### 126 **Participants.**

127 We recruited 22 healthy controls and 22 pathological gamblers, all men, following an in-depth structured  
128 psychiatric interview administered by a medical doctor (MINI Plus; Sheehan et al., 1998). One gambler  
129 was excluded because his data was accidentally not written to the log file for one drug session. One  
130 control participant and five gamblers were excluded due to extreme behaviours violating core  
131 assumptions of prospect theory (see *Statistical analysis* for more details). Therefore, the reported results  
132 are based on data from 21 controls and 16 gamblers. The present task was part of a larger study for  
133 which the participants were paid €50 on each session. The other tasks in the study were a reversal  
134 learning task (Janssen et al., 2015), a slot machine task measuring sensitivity to near-misses (Sescousse

## Dopaminergic drug effects on probability weighting

135 et al., 2016), and a mixed gamble task measuring loss aversion. All participants provided written  
136 informed consent, which was approved by the regional research ethics committee (Commissie  
137 Mensgebonden Onderzoek, region Arnhem-Nijmegen).

138 Pathological gamblers were recruited through advertisement ( $N = 13$ ) and addiction clinics ( $N =$   
139  $3$ ). None of the gamblers was in treatment at the time of testing, except for one of them who was just  
140 starting a cognitive behavioural therapy for his gambling problems. Controls were recruited through  
141 advertisement. All gamblers, with the exception of one, qualified as pathological gamblers ( $\geq 5$  DSM-IV  
142 criteria for pathological gambling; American Psychological Association, 2000). One gambler qualified as  
143 problem gambler as he met only four DSM-IV criteria. The severity of gambling symptoms was assessed  
144 using the South Oaks Gambling Screen (SOGS; Lesieur and Blume, 1987). All gamblers had a minimum  
145 SOGS score of 6 (range = 6–18), whereas controls, with the exception of two participants, had a SOGS  
146 score of 0 (range = 0–2).

147 The two groups were matched for age, net income, body mass index, and verbal IQ (Table 1).  
148 Participants were excluded if they consumed more than four alcoholic beverages daily; were using  
149 psychotropic medication; had a lifetime history of schizophrenia, bipolar disorder, attention deficit  
150 hyperactivity disorder, autism, eating disorder, anxiety disorder, or obsessive compulsive disorder; or  
151 had a past 6 months history of major depressive episode. Given the high co-morbidity between  
152 pathological gambling and other psychiatric disorders (Lorains et al., 2011), gamblers with the following  
153 co-morbidities were included: past cannabis dependence ( $> 5$  months;  $N = 1$ ); lifetime history of  
154 dysthymia ( $N = 1$ ); and remitted post-traumatic stress disorder (remitted  $> 4$  years;  $N = 1$ ). One gambler  
155 also used cannabis weekly in the past 6 months, but did not meet the DSM-IV criteria for  
156 abuse/dependence. The control participants did not have any history of substance abuse or dependence.  
157 A number of self-report questionnaires were further used to characterize the participants (Table 1).

158

### 159 **Pharmacological manipulation.**

160 Participants were tested once after receiving a sulpiride pill (Dogmatil®, 400mg), and once after a  
161 receiving a placebo pill filled with microcrystalline cellulose. The order of administration was randomized  
162 according to a double-blind, cross-over design (placebo-sulpiride: 10 controls, 8 gamblers; sulpiride-  
163 placebo: 11 controls, 8 gamblers). The test sessions were separated by at least 1 week. Sulpiride was  
164 chosen as the dopamine-modulating drug in this study based on a few reasons. First, it is one of the most  
165 selective agents, acting selectively on dopamine  $D_2/D_3$  receptors. As mentioned earlier,  $D_2/D_3$  agents are  
166 known to cause pathological gambling symptoms in a subset of patients with Parkinson's disease.  
167 Moreover, sulpiride has been shown to modulate the sensitivity to reward and punishment during

## Dopaminergic drug effects on probability weighting

168 learning in human studies (Eisenegger et al., 2014; van der Schaaf et al., 2014). Background  
169 neuropsychological functioning, physiological measures and subjective mood were measured at several  
170 time points during the protocol, in order to check for non-specific effects of sulpiride; no such effects  
171 were observed. The risky decision-making task was performed approximately 3 h 15 min after drug  
172 intake, thus coinciding with high plasma concentrations of sulpiride (von Bahr et al., 1991).

173

### 174 **Experimental design and statistical analysis.**

175 *Experimental task.* We used a “certainty equivalent” procedure (Fig. 1A) based on the protocol  
176 developed by Abdellaoui and colleagues (2008, 2011). Participants made series of hypothetical decisions  
177 between a sure amount of money (either a gain or a loss) and a gamble (either a pure-gain or pure-loss  
178 gamble). In each series of decisions, the gamble was fixed and the sure amount was iteratively adjusted  
179 in order to converge towards a “certainty equivalent” corresponding to the sure amount that felt  
180 subjectively equivalent to the gamble. There were 10 series of decisions (i.e., 10 different gambles) in the  
181 gain domain and 10 series of decisions in the loss domain (Table 2).

182 In each series of decisions, the sure amount offered on the first trial corresponded to the  
183 expected value of the gamble. On subsequent trials, the sure amount was adjusted based on the  
184 previous choice according to the bisection method (Abdellaoui et al., 2011), such that it was increased if  
185 the gamble was chosen, and was decreased if the sure option was chosen. This staircase procedure  
186 drove the participants toward their “certainty equivalent”, that is, the indifference point between the  
187 risky and safe options. The decision for each trial was self-paced, after which the participant’s choice was  
188 highlighted on the screen. Participants did not receive any feedback. Each series of decisions consisted of  
189 six trials, which is considered enough to provide reliable certainty equivalent estimates (Abdellaoui et al.,  
190 2011). In order to check for errors and random responses, each series ended with two control trials that  
191 required choosing between the gamble and a sure amount slightly above or below the estimated  
192 certainty equivalent. If the participant’s response was not consistent with previous choices, the series  
193 was repeated. Participants were not explicitly informed about these control trials. We checked that the  
194 number of repetitions was not significantly different between healthy controls and pathological  
195 gamblers (gain domain:  $Z = 0.55$ ,  $p = .60$ ; loss domain:  $Z = 1.31$ ,  $p = .20$ ), between the placebo and  
196 sulpiride drug conditions (gain domain:  $Z = 1.66$ ,  $p = .098$ ; loss domain:  $Z = 0.36$ ,  $p = .72$ ), or between  
197 gains and losses in general ( $Z = 1.47$ ,  $p = .14$ ).

198 In total, participants went through a minimum of 160 experimental trials (10 series \* [6 choices +  
199 2 control trials] \* 2 [gain/loss]). The task was the same in the loss domain but with negative amounts of  
200 money. Gain and loss trials were presented in separate blocks and the order of the blocks was counter-

## Dopaminergic drug effects on probability weighting

201 balanced across participants and drug sessions. The order of the gambles within gain and loss blocks was  
202 randomized. The task was performed on a computer and the task presentation was created with the  
203 Psychophysics Toolbox 2 (Brainard, 1997) for Matlab (www.mathworks.com).

204 *Behavioural modelling.* We used the semi-parametric method introduced by Abdellaoui et al. (2008,  
205 2011; see also Fox and Poldrack, 2014) in order to estimate the value and probability weighting functions  
206 of prospect theory. This procedure was employed separately for gains and losses and for the drug and  
207 placebo conditions, within each individual participant.

208 In the first step of the procedure, the certainty equivalents of the gambles with varying amounts  
209 of money but a fixed probability of 2/6 (gamble indices  $i = 2, \dots, 7$  in Table 2) were used to estimate the  
210 probability weight  $w(2/6)$  as well as the curvature of a parametrically defined version of the value  
211 function  $v(\bullet)$ . By definition, the utility of each gamble is equal to the utility of its certainty equivalent  
212 and, based on prospect theory, we can write:

213

$$v(CE) = w(p)v(x) + (1-w(p))v(y) \quad (1)$$

214

215 where  $CE$  is the certainty equivalent,  $x$  is the amount of money to be won with probability  $p$  and  $y$  is the  
216 amount of money to be won with probability  $1-p$ . Assuming a power function  $x^\alpha$  for  $v(\bullet)$  (Fox and  
217 Poldrack, 2014), where  $\alpha$  quantifies sensitivity to outcome values, we can further write:

218

$$CE = [w(p)(x^\alpha - y^\alpha) + y^\alpha]^{\frac{1}{\alpha}} \quad (2)$$

219

220 Using a non-linear least squares procedure (*lsqcurvefit* function in Matlab), we could then estimate the  
221 optimal parameter values  $\alpha$  and  $w(2/6)$  that minimized the least squares  $|CE(i) - \widehat{CE}(i)|$ , where  $\widehat{CE}(i)$   
222 are the estimated certainty equivalents for gambles indices  $i = 2, \dots, 7$ , expressed as:

223

$$\widehat{CE}(i) = [w(2/6)((x_i)^\alpha - (y_i)^\alpha) + (y_i)^\alpha]^{\frac{1}{\alpha}} \quad (3)$$

224

225 In the second step of the procedure, non-parametric estimates of the remaining probability  
226 weights  $w(1/6)$ ,  $w(3/6)$ ,  $w(4/6)$  and  $w(5/6)$  were derived from the certainty equivalents of the  
227 corresponding gambles (gamble indices  $i = 1, 8, 9$  and  $10$  in Table 2). Since  $y = 0$  in these gambles, based  
228 on equation (2) each probability weight can be calculated as follows:



## Dopaminergic drug effects on probability weighting

229

$$CE = [w(p)x^\alpha]^{\frac{1}{\alpha}} \Leftrightarrow w(p) = \frac{CE^\alpha}{x^\alpha} \quad (4)$$

230

231 Based on those probability weights, we further derived a parametric estimation of the  
232 probability weighting function. We used a non-linear least squares procedure to estimate the two-  
233 parameter function proposed by Lattimore and colleagues (Lattimore et al., 1992), in which the  
234 sensitivity to changes in probabilities is quantified with distortion parameter  $\gamma$ , and the optimism about  
235 risk is quantified with elevation parameter  $\delta$ :

236

$$w(p) = \frac{\delta p^\gamma}{\delta p^\gamma + (1-p)^\gamma} \quad (5)$$

237

238 In order to avoid local minima in our least squares estimations, we used an approach with  
239 randomized starting values. The two-step estimation procedure was run 200 times with starting values  
240 randomly drawn from [0, 5] for parameters  $\alpha$ ,  $\delta$ , and  $\gamma$ , and from [0, 1] for  $w(2/6)$ . The resulting prospect  
241 theory parameters with the smallest squared norm of the residuals ('resnorm'), reflecting the goodness-  
242 of-fit between the model and the data, were selected for the subsequent statistical analysis. Note that  
243 the 'resnorm' values did not differ between drugs or groups for either of the two least square  
244 estimations (paired and independent t-tests, respectively: all  $p_{\text{corr}} > 0.2$ ), suggesting that the average  
245 goodness-of-fit was comparable across drugs and groups.

246 *Statistical analysis.* One control participant and four pathological gamblers were excluded from  
247 subsequent group analyses based on their certainty equivalents. Indeed, for all these participants, the  
248 absolute value of their certainty equivalent was higher for Gamble 1 ( $x = \pm 1200\text{€}$ ,  $p = 1/6$ ) than for  
249 Gamble 10 ( $x = \pm 1200\text{€}$ ,  $p = 5/6$ ), in at least one of the four conditions of interest (Gain/Loss \*  
250 Placebo/Sulpiride). This behaviour violates the basic assumption of positive monotonicity in the  
251 evaluation of probabilities. One pathological gambler was further excluded due to extremely risk averse  
252 behaviour ( $\alpha$  value over three standard deviations away from the mean) that likely resulted from a fear  
253 of losing control and relapsing into compulsive gambling (as reported by the participant during  
254 debriefing). While the primary analyses were performed on the reduced sample resulting from these  
255 exclusions, we also performed analyses on the full sample in order to verify that our results were not  
256 distorted by our exclusion procedure (see Sensitivity analyses in the Results section for details).



## Dopaminergic drug effects on probability weighting

257 Prospect theory parameters  $\alpha$ ,  $\delta$ , and  $\gamma$  were compared across groups and drug conditions,  
258 separately in the gain and loss domains, using non-parametric statistics due to the non-normal  
259 distribution of the data. Main effects of the within-subject *Drug* factor were assessed using Wilcoxon  
260 tests. Main effects of between-subject *Group* factor were assessed using Mann-Whitney *U* tests, after  
261 parameters were averaged across drug sessions. *Drug-by-Group* as well as *Drug-by-Drug Order*  
262 interactions were examined with Mann-Whitney *U* tests comparing sulpiride minus placebo values  
263 between groups. Bonferroni correction was used to correct for the six comparisons performed for each  
264 dependent variable (parameters  $\alpha$ ,  $\delta$ , and  $\gamma$ ): the two main effects of *Drug* and *Group* as well as their  
265 interaction, times the two contexts (gains and losses). Therefore, the corrected *p*-values correspond to  
266 the uncorrected *p*-values multiplied by 6. For effect sizes, we use the Common Language Effect sizes  
267 (CLE; Wuensch, 2015; Grissom and Kim, 2012) for intuitive interpretation. For the Mann-Whitney *U* tests,  
268 the CLE was calculated as *U* divided by the product of the two groups' sample sizes. For the Wilcoxon  
269 tests, the CLE was calculated as the number of positive differences (in favour of sulpiride over placebo)  
270 divided by the number of comparisons, that is, the total sample size. Therefore, the CLE represents the  
271 probability of a randomly selected value from one group/condition being higher than a randomly  
272 sampled value from the other group/condition. For both tests, there is no difference between the groups  
273 or conditions at CLE = .5.

274 *Code accessibility.* The data and code used to produce the reported results are available as Extended  
275 Data. The data and code can be found with DOI references and addresses  
276 [doi.org/10.6084/m9.figshare.5311354](https://doi.org/10.6084/m9.figshare.5311354) and [doi.org/10.6084/m9.figshare.5311456](https://doi.org/10.6084/m9.figshare.5311456), respectively. The code  
277 was run with a standard Windows 7 Professional 64-bit desktop computer (Intel Xeon CPU E5-1620,  
278 16GB RAM), both with MATLAB R2013a and R2016a.

279

## 280 **Results**

281 Table 3 reports group estimates for parameters  $\alpha$ ,  $\delta$ , and  $\gamma$  in the study. Figure 3 illustrates the shape of  
282 the probability weighting function separately for the gain/loss and placebo/sulpiride conditions in each  
283 group.

284

### 285 **Sensitivity to changes in probabilities (distortion parameter $\gamma$ )**

286 A change in the distortion parameter  $\gamma$  of the probability weighting function represents a change in the  
287 non-linear weighting and thus the sensitivity to changes in probability. The distortion parameter  $\gamma$  did

## Dopaminergic drug effects on probability weighting

288 not significantly differ between control participants and pathological gamblers either in the gain domain,  
289 ( $Z = 1.47$ ,  $p_{\text{uncorr}} = .15$ ,  $\text{CLE} = .64$ ) or the loss domain ( $Z = -1.13$ ,  $p_{\text{uncorr}} = .27$ ,  $\text{CLE} = .39$ ).

290 However, there was a significant effect of the drug on  $\gamma$  in the gain domain ( $Z = 2.96$ ,  $p_{\text{uncorr}} =$   
291  $.003$ ,  $p_{\text{corr}} = .018$ ,  $\text{CLE} = .70$ ). Specifically, participants had higher values of  $\gamma$  under sulpiride ( $Mdn = 0.69$ )  
292 than under placebo ( $Mdn = 0.58$ ), indicating lower levels of distortion of the probability weighting  
293 function in the sulpiride condition (Fig. 2). In the loss domain, there was no difference between placebo  
294 and sulpiride ( $Z = 0.36$ ,  $p_{\text{uncorr}} = .72$ ,  $\text{CLE} = .41$ ). Drug effect did not interact with drug order in either the  
295 gain ( $Z = 1.46$ ,  $p = .15$ ,  $\text{CLE} = .65$ ) or the loss domain ( $Z = 0.58$ ,  $p_{\text{uncorr}} = .58$ ,  $\text{CLE} = .56$ ), indicating no  
296 reliable session effects. The drug effect (sulpiride–placebo) was not significantly different between  
297 control participants and pathological gamblers in the gain domain ( $Z = 0.55$ ,  $p_{\text{uncorr}} = .60$ ,  $\text{CLE} = .55$ ) or in  
298 the loss domain ( $Z = -2.02$ ,  $p_{\text{uncorr}} = .044$ ,  $p_{\text{corr}} = .26$ ,  $\text{CLE} = .30$ ).

### 299 **Optimism about risk (elevation parameter $\delta$ )**

300 A change in the elevation parameter  $\delta$  of the probability weighting function represents a shift in the  
301 weighting of the entire probability range, thus reflecting overall optimism or pessimism about risk. The  
302 elevation parameter  $\delta$  did not significantly differ between control participants and pathological gamblers  
303 either in the gain domain ( $Z = -1.41$ ,  $p_{\text{uncorr}} = .17$ ,  $\text{CLE} = .36$ ) or in the loss domain ( $Z = -1.96$ ,  $p_{\text{uncorr}} = .051$ ,  
304  $p_{\text{corr}} = .31$ ,  $\text{CLE} = .31$ ). Moreover, there was no effect of drug either in the gain domain ( $Z = -0.31$ ,  $p_{\text{uncorr}} =$   
305  $.76$ ,  $\text{CLE} = .43$ ) or in the loss domain ( $Z = 0.39$ ,  $p_{\text{uncorr}} = .70$ ,  $\text{CLE} = .59$ ). Finally, the drug effect  
306 (sulpiride–placebo) was not significantly different between control participants and pathological  
307 gamblers in the gain domain ( $Z = -0.74$ ,  $p = .48$ ,  $\text{CLE} = .43$ ) or in the loss domain ( $Z = 1.57$ ,  $p = .12$ ,  $\text{CLE} =$   
308  $.65$ ).

309 For optimal comparison with our previous study in which we found a group difference in  $\delta$  in the  
310 gain domain (Ligneul et al., 2013), we further compared the groups in the placebo condition alone. This  
311 analysis did not reveal a significant group difference in  $\delta$  the gain domain ( $Z = .03$ ,  $p_{\text{uncorr}} = 1.0$ ,  $\text{CLE} = .50$ )  
312 but did reveal a significant difference in the loss domain ( $Z = -2.9$ ,  $p_{\text{uncorr}} = .003$ ,  $p_{\text{corr}} = .018$ ,  $\text{CLE} = .22$ ).  
313 Specifically, pathological gamblers had lower values of  $\delta$  ( $Mdn = 0.42$ ) than control participants ( $Mdn =$   
314  $1.08$ ), indicating lower elevation of the probability weighting function in the loss domain (Fig. 3C, D).

315

### 316 **Sensitivity to outcomes (curvature parameter $\alpha$ )**

317 Since our procedure also enabled to measure the curvature parameter of the value function, we also  
318 examined potential effects of group and drug. Non-parametric tests indicated that there was no  
319 significant difference between control participants and pathological gamblers either in the gain domain

## Dopaminergic drug effects on probability weighting

320 ( $Z = 0.86$ ,  $p_{\text{uncorr}} = .40$ ,  $\text{CLE} = .58$ ) or in the loss domain ( $Z = 1.17$ ,  $p_{\text{uncorr}} = .25$ ,  $\text{CLE} = .61$ ). Moreover, there  
321 was no effect of drug in the gain domain ( $Z = 1.53$ ,  $p_{\text{uncorr}} = .13$ ,  $\text{CLE} = .62$ ) or in the loss domain ( $Z = -1.21$ ,  
322  $p_{\text{uncorr}} = .23$ ,  $\text{CLE} = .41$ ). Finally, the drug effect (sulpiride–placebo) was not significantly different  
323 between control participants and pathological gamblers in the gain domain ( $Z = 1.96$ ,  $p_{\text{uncorr}} = .051$ ,  $p_{\text{corr}} =$   
324  $.31$ ,  $\text{CLE} = .69$ ) or in the loss domain ( $Z = -1.69$ ,  $p_{\text{uncorr}} = .10$ ,  $\text{CLE} = .34$ ).

### 325 Sensitivity analyses

326 In order to confirm the pattern of our main result on probability distortion, we performed an analysis of  
327 the probability weights themselves, which were obtained using a semi-parametric procedure, as  
328 opposed to the parametric estimation of  $\gamma$ . Specifically, we performed a 2 (Groups) x 2 (Drugs) x 5  
329 (Probability levels: 1/6, 2/6, 3/6, 4/6 and 5/6) ANOVA on the probability weights  $w(p)$  in the gain domain.  
330 We observed a significant interaction of Drug and Probability level on the  $w(p)$  ( $F(2.7, 94.495) = 3.21$ ,  $p =$   
331  $.031$ ,  $\eta^2 = .084$ ), thus strengthening our main result that sulpiride differentially modulates small versus  
332 medium-to-large probability weights. However, matched samples post-hoc t-tests between the  $w(p)$  for  
333 the two drug conditions failed to reach significance ( $w(1/6)$ :  $t(36) = 1.15$ ,  $p = .26$ ,  $w(2/6)$ :  $t(36) = 1.39$ ,  $p =$   
334  $.17$ ,  $w(3/6)$ :  $t(36) = 0.62$ ,  $p = .54$ ,  $w(4/6)$ :  $t(36) = -0.15$ ,  $p = .26$ ,  $w(5/6)$ :  $t(36) = -1.41$ ,  $p = .17$ ).

335 We also repeated our estimation procedure with different variations to check the robustness of  
336 our results despite small changes in the way the parameters were estimated. First, we estimated  
337 parameters  $\delta$  and  $\gamma$  using the Prelec version of the probability weighing function (Prelec, 1998), instead  
338 of the Lattimore version (Lattimore et al., 1992). The Prelec function is defined by the following  
339 equation:

$$w(p) = e^{-\delta(-\ln p)^\gamma} \quad 6)$$

341  
342 The parameters  $\delta$  and  $\gamma$  have the same interpretation as in the Lattimore function, except that the  
343 degree of elevation decreases when the parameter  $\delta$  increases. When the same analysis was conducted  
344 on the parameter estimates obtained with the Prelec function, the drug effect on the distortion  
345 parameter  $\gamma$  remained significant ( $Z = 2.71$ ,  $p_{\text{uncorr}} = .007$ ,  $p_{\text{corr}} = .032$ ,  $\text{CLE} = .70$ ), emphasizing that  
346 sulpiride decreases the distortion of the probability weighting function (i.e., increases the parameter  $\gamma$ )  
347 compared with placebo.

348 In addition, the drug effect on the distortion parameter  $\gamma$  remained significant ( $Z = 2.96$ ,  $p_{\text{uncorr}} =$   
349  $.003$ ,  $p_{\text{corr}} = .018$ ,  $\text{CLE} = .70$ ) when we used a linear value function ( $\alpha = 1$ ) instead of a power function ( $x^\alpha$ ),  
350 a common assumption made by Ligneul et al. (2013).

## Dopaminergic drug effects on probability weighting

351 Furthermore, using the original analysis with the power and Lattimore functions, the drug effect  
352 on the distortion parameter  $\gamma$  remained significant when we excluded the one participant with past  
353 cannabis dependence ( $Z = 2.83$ ,  $p_{\text{uncorr}} = .005$ ,  $p_{\text{corr}} = .030$ ,  $\text{CLE} = .69$ ). It also remained significant when we  
354 included all possible participants, i.e., when none of the participants were excluded based on  
355 behavioural criteria, leading to 22 healthy controls and 21 pathological gamblers ( $Z = 3.50$ ,  $p_{\text{uncorr}} =$   
356  $.00046$ ,  $p_{\text{corr}} = .0028$ ,  $\text{CLE} = .72$ ). However, the group effect on the elevation parameter previously  
357 observed in the Loss/Placebo condition did not remain significant when all participants were included,  $Z$   
358  $= -2.6$ ,  $p_{\text{uncorr}} = .009$ ,  $p_{\text{corr}} = .054$ ,  $\text{CLE} = .27$ .

359 Finally, in order to assess the accuracy of the parameter estimation, we ran a parameter  
360 recovery procedure (Heathcote et al., 2015). First, we used the parameter values from the original  
361 estimation to simulate new data. Specifically, we generated synthetic certainty equivalents for every  
362 gamble (i.e., 10 gambles in the gain the domain and 10 gambles in the loss domain) for each participant  
363 and each drug condition, using equation (2). From there we created 200 noisy synthetic datasets by  
364 adding normally distributed noise to these synthetic certainty equivalents; following standards in the  
365 field, the standard error of the noise was set to be the median (over all participants and conditions) of  
366 the root-mean-squared error between the original and simulated values. We then used these noisy  
367 synthetic datasets in combination with the previously described semi-parametric procedure (Abdellaoui  
368 et al., 2011), in order to perform 200 estimations of  $w(2/6)$ ,  $\alpha$ ,  $\delta$ , and  $\gamma$  parameters. Across-subject  
369 correlation coefficients between the original and the recovered parameter values (defined as medians  
370 over the 200 simulations) were above .95 for all parameters in all conditions, indicating efficient  
371 parameter recovery and high accuracy in the original parameter estimation. Our main result indicating a  
372 significant drug effect on the distortion parameter  $\gamma$  showed an even larger effect size with the  
373 recovered parameter values ( $\text{CLE} = .76$ ) than with the original parameters ( $\text{CLE} = .70$ ).

374

## 375 Discussion

376 This study investigated the effect of a dopaminergic manipulation on probability weighting during risk-  
377 taking in pathological gamblers and healthy participants. In line with our first hypothesis, we found that  
378 blocking dopamine  $D_2/D_3$  receptors attenuated probability distortion in the gain domain. However, in  
379 contrast to our second hypothesis, the elevation of the probability weighting function was not affected  
380 by the dopaminergic manipulation and did not differ between pathological gamblers and healthy  
381 controls in the gain domain, even though a group difference was observed in the loss domain under  
382 placebo. Similarly, we did not find evidence for differences in sensitivity to outcomes between

## Dopaminergic drug effects on probability weighting

383 pathological gamblers and healthy controls, as well as no effect of the drug on the sensitivity to  
384 outcomes.

385 Our results demonstrate that the degree of non-linear probability weighting during decision-  
386 making is modulated by dopamine. More specifically, blocking  $D_2/D_3$  receptors decreased probability  
387 distortion in the gain domain; this made participants more linear – or rational – in their overall  
388 assessment of probabilities, and thus more sensitive to changes in probabilities in the medium range.  
389 Such a differential effect of a dopaminergic agent on low versus high probabilities is consistent with  
390 several previous studies. For instance, Norbury et al. (2013) have shown that, in low sensation-seeking  
391 participants, the dopamine  $D_2/D_3$  receptor agonist cabergoline increases risk-taking for high winning  
392 probabilities, while decreasing it for low winning probabilities. Similarly, Stopper et al. (2013) have  
393 shown that in rats, the administration of a dopamine  $D_1$  receptor agonist increases risk-taking behaviour  
394 in the context of high winning probabilities, but decreases it in the context of low winning probabilities.  
395 Interestingly, in all these studies including ours, the interaction of dopaminergic drug effects with  
396 probability level led to more rational behaviour maximizing long-term expected value. Thus, it could be  
397 that, instead of inducing a shift in risk-taking, modulating dopamine might induce a shift in the  
398 adherence to the principle of expected value maximization. This is an intriguing hypothesis that would  
399 deserve to be formally tested in future studies.

400 Particularly relevant for the current study is the work of Takahashi et al. (2010), which to our  
401 knowledge is the only study that has explicitly investigated the role of dopamine in probability weighting.  
402 In their PET study, Takahashi et al. (2010) reported that lower dopamine  $D_1$ , but not  $D_2$ , receptor binding  
403 in the striatum was associated with higher levels of probability distortion. This seems partly at odds with  
404 the current results, which suggest that that  $D_2$  receptor stimulation also plays a role in probability  
405 weighting. One hypothesis is that the drug effect observed in the current study could reflect a change in  
406 the balance between  $D_1$ - and  $D_2$ -receptor mediated activity in the direct and indirect pathways of the  
407 basal ganglia respectively, with sulpiride-induced  $D_2/D_3$  receptor blockade being associated with a shift  
408 towards  $D_1$ -receptor-dependent Go-pathway activity (Frank and O'Reilly, 2006; van der Schaaf et al.,  
409 2014; Jocham et al., 2011). Accordingly, we observed that  $D_2/D_3$  receptor blockade decreases distortion,  
410 which is in line with the observation of Takahashi et al. that higher  $D_1$  receptor binding in the striatum is  
411 also associated with less distortion.

412 A number of previous studies have shown that dopaminergic manipulations induce a global shift  
413 in risk attitudes, i.e. they either increase or decrease risk-taking, both in humans (Rigoli et al., 2016;  
414 Rutledge et al., 2015; Djamshidian et al., 2010; Riba et al., 2008) and animals (Zeeb et al., 2009; Cocker et  
415 al., 2012; St Onge and Floresco, 2009). As mentioned previously, the lack of such an effect in our study

## Dopaminergic drug effects on probability weighting

416 could stem from the fact that, in contrast to most of these studies, which only manipulated one  
417 probability (or a limited range of probabilities), we considered the whole range of probabilities and  
418 observed opposite effects for high and low probabilities. Another distinctive feature of our experimental  
419 design is the absence of monetary feedback, which was meant to avoid contamination of the decision-  
420 making process by previous outcomes (Schonberg et al., 2011). This is important since risk attitudes, and  
421 in particular probability distortion, have been shown to differ when making decisions from description  
422 (as is the case in our study) versus from experience (i.e., based on feedback) (Hertwig and Erev, 2009). In  
423 addition, recent evidence in rats suggests that the influence of the dopamine  $D_2$  pathway on risky  
424 behaviour is exerted via the signalling of prior outcomes (Zalocusky et al., 2016). Thus, the absence of  
425 feedback in our task could explain why the blockade of dopamine  $D_2$  receptors failed to produce a global  
426 effect on risk attitudes. Interestingly, the vast majority of human studies reporting a global shift in risk-  
427 taking following a dopaminergic manipulation have used dopamine-enhancing agents such as L-Dopa.  
428 We are not aware of any studies reporting similar effects following dopamine  $D_2/D_3$  receptor blockade.

429 We were not able to replicate our previous result showing an elevation of the probability  
430 weighting function in the gain domain (i.e., increased preference for risk) in pathological gamblers  
431 compared with healthy controls (Ligneul et al., 2013). One important methodological difference is that  
432 the monetary amounts used in the current study were much higher than in our previous study (300-  
433 1200€ versus 2-20€). It has been observed that people tend to be more risk-seeking for low-stake  
434 gambles than large-stake gambles, an observation referred to as the “peanuts effect” (Prelec and  
435 Loewenstein, 1991; see also Weber and Chapman, 2005). It is possible that the gamblers in our previous  
436 study were particularly sensitive to the peanuts effect and engaged in particularly high risk-seeking  
437 behaviour in the presence of low-stake gambles. It is also possible that the control participants in the  
438 current study happened to be more risk-seeking than average. The qualitative comparison of median  
439 values for the elevation parameter in the gain domain (Ligneul et al. 2013:  $\delta_{\text{Controls}} = 0.74$ ,  $\delta_{\text{Gamblers}} = 1.03$ ;  
440 current study:  $\delta_{\text{Controls}} = 0.99$ ,  $\delta_{\text{Gamblers}} = 0.90$ ) with typical values reported in the literature (Fox and  
441 Poldrack, 2014, Table A.3: median  $\delta = 0.77$ ) lends credence to these hypotheses: it seems that the  
442 control participants in the current study were more risk-seeking than average, while the gamblers were  
443 less-risking than in our previous study.

444 Another difference is that in our previous study, we assumed a linear value function, whereas in  
445 the current study we estimated it empirically based on the certainty equivalents. Given the trade-off  
446 between prospect theory parameters  $\alpha$  (curvature parameter of the value function) and  $\delta$  (elevation  
447 parameter of the probability weighting function) in accounting for risk attitudes (Fox and Poldrack,  
448 2014), it could be that part of the risk-seeking behaviour was absorbed by the  $\alpha$  parameter in our current



## Dopaminergic drug effects on probability weighting

449 modelling procedure, whereas all of it was absorbed by the  $\delta$  parameter in the previous study. Note  
450 however that our present results remained qualitatively unchanged when the estimation procedure was  
451 run with a linear value function, that is, we did not observe group differences in the probability  
452 weighting function when using either the linear or power forms of the value function.

453 While no group difference was observed in the gain domain, analyses restricted to the placebo  
454 condition revealed that, in the loss domain, pathological gamblers showed a significant decrease in the  
455 elevation of their probability weighting function compared with healthy controls (Fig. 3C, D). This  
456 observation implies a general underweighting of losing probabilities, which could contribute to the  
457 optimism bias and excessive risk-taking behaviour observed in pathological gamblers. However, given  
458 that this result was not predicted and only applies to the placebo condition, we prefer to refrain from  
459 speculating further before it is replicated.

460 This study is not without limitations. First, we had a modest sample size, due partly to the  
461 complexities of running pharmacological studies in patients, and the exclusion of several participants  
462 based on outlying behaviour and violations of basic prospect theory assumptions. Yet, in order to  
463 mitigate the increased likelihood of false positives (Poldrack et al., 2017), we implemented stringent  
464 Bonferroni correction for multiple comparisons, and demonstrated the convergence of results across  
465 various sensitivity analyses. Note also that our sample was composed exclusively of men, and that  
466 further study is necessary to assess whether our results generalize to women, especially given previous  
467 evidence of gender differences in probability weighting (Fehr-Duda et al., 2006). Another limitation is the  
468 moderate test-retest reliability of decision-making measures in addictive disorders such as pathological  
469 gambling (Kräplin et al., 2016). This might have limited our ability to replicate our previous result on the  
470 elevation of probability weighting (Ligneul et al., 2013) and more generally our ability to uncover true  
471 differences between groups or drugs. Furthermore, individual risk preferences have been shown to vary  
472 substantially across tasks, a phenomenon known as the “risk elicitation puzzle” and partly attributable to  
473 inconsistent decision strategies across tasks (Pedroni et al., 2017). This observation warrants some  
474 caution regarding the generalizability of the present findings, which could be partly driven by the specific  
475 demands of the task that we used. In particular, using a more ecological gambling task might have  
476 revealed clearer differences in risk-taking between pathological gamblers and healthy controls  
477 (Schonberg et al., 2011).

478 In summary, this study provides evidence supporting the hypothesis that modulating dopamine  
479 affects how humans weight winning probabilities during decision-making. Dopamine  $D_2/D_3$  receptor  
480 antagonism shifts probability weighting in the direction of more objective, economically rational  
481 decision-making. In future studies, it will be important to replicate this result, and further compare the



## Dopaminergic drug effects on probability weighting

482 contributions of D<sub>1</sub> and D<sub>2</sub>/D<sub>3</sub> receptors with the same method, since the effect has now been observed  
483 in relation to both receptors (see Takahashi et al., 2010).

## Dopaminergic drug effects on probability weighting

### 484 **References**

- 485
- 486 Abdellaoui M, Bleichrodt H, L'Haridon O (2008) A tractable method to measure utility and loss aversion  
487 under prospect theory. *J Risk Uncertain* 36:245–266.
- 488 Abdellaoui M, Diecidue E, Öncüler A (2011) Risk preferences at different time periods: an experimental  
489 investigation. *Manage Sci* 57:975–987.
- 490 von Bahr C, Wiesel F, Movin G, Eneroth P, Jansson P, Nilsson L, Ogenstad S (1991) Neuroendocrine  
491 responses to single oral doses of remoxipride and sulpiride in healthy female and male  
492 volunteers. *Psychopharmacology* 103:443–448.
- 493 Barrus MM, Winstanley CA (2016) Dopamine D<sub>3</sub> Receptors Modulate the Ability of Win-Paired Cues to  
494 Increase Risky Choice in a Rat Gambling Task. *J Neurosci* 36:785–794.
- 495 Boileau I, Payer D, Chugani B, Lobo DSS, Houle S, Wilson AA, Warsh J, Kish SJ, Zack M (2014) In vivo  
496 evidence for greater amphetamine-induced dopamine release in pathological gambling: a  
497 positron emission tomography study with [(11)C]-(+)-PHNO. *Mol Psychiatry* 19:1305–1313.
- 498 Brainard DH (1997) The Psychophysics Toolbox. *Spat Vis* 10:433–436.
- 499 Cocker PJ, Dinelle K, Kornelson R, Sossi V, Winstanley CA (2012) Irrational choice under uncertainty  
500 correlates with lower striatal D2/3 receptor binding in rats. *J Neurosci* 32:15450–15457.
- 501 Cools R, Barker RA, Sahakian BJ, Robbins TW (2003) L-Dopa medication remediates cognitive inflexibility,  
502 but increases impulsivity in patients with Parkinson's disease. *Neuropsychologia* 41:1431–1441.
- 503 Djamshidian A, Jha A, O'Sullivan SS, Silveira-Moriyama L, Jacobson C, Brown P, Lees A, Auerbach BB  
504 (2010) Risk and learning in impulsive and nonimpulsive patients with Parkinson's disease. *Mov*  
505 *Disord* 25:2203–2210.
- 506 Dreber A, Apicella CL, Eisenberg DTA, Garcia JR, Zamore RS, Lum JK, Campbell B (2009) The 7R  
507 polymorphism in the dopamine receptor D4 gene (DRD4) is associated with financial risk taking  
508 in men. *Evol Hum Behav* 30:85–92.
- 509 Eisenegger C, Naef M, Linssen A, Clark L, Gandamaneni PK, Müller U, Robbins TW (2014) Role of  
510 dopamine D2 receptors in human reinforcement learning. *Neuropsychopharmacology* 39:2366–  
511 2375.
- 512 van Enkhuizen J, Henry BL, Minassian A, Perry W, Milienne-Petiot M, Higa KK, Geyer MA, Young JW  
513 (2014) Reduced dopamine transporter functioning induces high-reward risk-preference  
514 consistent with bipolar disorder. *Neuropsychopharmacology* 39:3112–3122.
- 515 Fehr-Duda H, De Gennaro M, Schubert R (2006) Gender, financial risk, and probability weights. *Decision*  
516 *and Theory* 60: 283–313.

## Dopaminergic drug effects on probability weighting

- 517 Fox CR, Poldrack RA (2014) Appendix: Prospect Theory and the Brain. In: Neuroeconomics: Decision  
518 Making and the Brain (Glimcher PW, Camerer CF, Fehr E, Poldrack RA, eds), pp 533–567. New  
519 York, NY: Academic Press.
- 520 Frank MJ, Seeberger LC, O’Reilly RC (2004) By carrot or by stick: cognitive reinforcement learning in  
521 Parkinsonism. *Science* 306:1940–1943.
- 522 Frank MJ, O’Reilly RC (2006) A mechanistic account of striatal dopamine function in human cognition:  
523 Psychopharmacological studies with cabergoline and haloperidol. *Behav Neurosci* 120:497–517.
- 524 Gonzalez R, Wu G (1999) On the shape of the probability weighting function. *Cogn Psychol* 38:129–166.
- 525 Heatherton TF, Kozlowski LT, Frecker RC, Fagerström K-O (1991) The Fagerström Test for Nicotine  
526 Dependence: a revision of the Fagerström Tolerance Questionnaire. *Br J Addict* 86:1119–1127.
- 527 Heathcote A, Brown SD, Wagenmakers E-J (2015) An Introduction to Good Practices in Cognitive  
528 Modeling. In: An Introduction to Model-Based Cognitive Neuroscience (Forstmann BU,  
529 Wagenmakers E-J, eds), pp 25–48. New York, NY: Springer New York.
- 530 Hertwig R, Erev I (2009) The description-experience gap in risky choice. *Trends Cogn Sci* 13:517–523.
- 531 Hsu M, Krajbich I, Zhao C, Camerer CF (2009) Neural response to reward anticipation under risk is  
532 nonlinear in probabilities. *J Neurosci* 29:2231–2237.
- 533 Janssen LK, Sescousse G, Hashemi MM, Timmer MHM, Ter Huurne NP, Geurts DEM, Cools R (2015)  
534 Abnormal modulation of reward versus punishment learning by a dopamine D2-receptor  
535 antagonist in pathological gamblers. *Psychopharmacology* 232:3345–3353.
- 536 Jocham G, Klein TA, Ullsperger M (2011) Dopamine-mediated reinforcement learning signals in the  
537 striatum and ventromedial prefrontal cortex underlie value-based choices. *J Neurosci* 31:1606–  
538 1613.
- 539 Kahneman D, Tversky A (1979) Prospect theory: an analysis of decision under risk. *Econometrica* 47:263–  
540 291.
- 541 Kräplin A, Scherbaum S, Bühringer G, Goschke T (2016) Retest reliabilities of decision-making and  
542 cognitive control measures in addictive disorders. *Sucht* 62:191–202.
- 543 Kuhnen CM, Chiao JY (2009) Genetic determinants of financial risk taking. *PLoS One* 4.
- 544 Lattimore PK, Baker JR, Witte AD (1992) The influence of probability on risky choice: A parametric  
545 examination. *J Econ Behav Organ* 17:377–400.
- 546 Lesieur H, Blume S (1987) The South Oaks Gambling Screen (SOGS): a new instrument for the  
547 identification of pathological gamblers. *Am J Psychiatry* 144:1184–1188.
- 548 Ligneul R, Sescousse G, Barbalat G, Domenech P, Dreher J-C (2013) Shifted risk preferences in  
549 pathological gambling. *Psychol Med* 43:1–10.

## Dopaminergic drug effects on probability weighting

- 550 Lobo DSS, Aleksandrova L, Knight J, Casey DM, El-Guebaly N, Nobrega JN, Kennedy JL (2015) Addiction-  
551 related genes in gambling disorders: New insights from parallel human and pre-clinical models.  
552 Mol Psychiatry 20:1002–1010.
- 553 Lorains FK, Cowlshaw S, Thomas SA (2011) Prevalence of comorbid disorders in problem and  
554 pathological gambling: Systematic review and meta-analysis of population surveys. Addiction  
555 106:490–498.
- 556 Mata R, Hau R, Papassotiropoulos A, Hertwig R (2012) DAT1 polymorphism is associated with risk taking  
557 in the Balloon Analogue Risk Task (BART). PLoS One 7: e39135.
- 558 Norbury A, Manohar S, Rogers RD, Husain M (2013) Dopamine modulates risk-taking as a function of  
559 baseline sensation-seeking trait. J Neurosci 33:12982–12986.
- 560 Payer D, Balasubramaniam G, Boileau I (2014) What is the role of the D<sub>3</sub> receptor in addiction? A mini  
561 review of PET studies with [<sup>11</sup>C]-(+)-PHNO. Prog Neuro-Psychopharmacology Biol Psychiatry  
562 52:4–8.
- 563 Pedroni A, Frey R, Bruhin A, Dutilh G, Hertwig R, Rieskamp J (2017) The risk elicitation puzzle. Nat Hum  
564 Behav 1:803–809.
- 565 Pessiglione M, Seymour B, Flandin G, Dolan RJ, Frith CD (2006) Dopamine-dependent prediction errors  
566 underpin reward-seeking behaviour in humans. Nature 442:1042–1045.
- 567 Poldrack RA, Baker CI, Durnez J, Gorgolewski KJ, Matthews PM, Munafò M, Nichols TE, Poline J-B, Vul E,  
568 Yarkoni T (2017) Scanning the horizon: towards transparent and reproducible neuroimaging  
569 research. Nat Rev Neurosci 18:115–126.
- 570 Prelec D (1998) The probability weighting function. Econometrica 66:497–527.
- 571 Prelec D, Loewenstein G (1991) Decision making over time and under uncertainty: a common approach.  
572 Manage Sci 37:770–786.
- 573 Riba J, Krämer UM, Heldmann M, Richter S, Münte TF (2008) Dopamine agonist increases risk taking but  
574 blunts reward-related brain activity. PLoS One 3: e2479.
- 575 Rigoli F, Rutledge RB, Chew B, Ousdal OT, Dayan P, Dolan RJ (2016) Dopamine increases a value-  
576 independent gambling propensity. Neuropsychopharmacology 41:2658–2667.
- 577 Rutledge RB, Skandali N, Dayan P, Dolan RJ (2015) Dopaminergic modulation of decision making and  
578 subjective well-being. J Neurosci 35:9811–9822.
- 579 Saunders JB, Aasland OG, Babor TF, De la Fuente JR, Grant M (1993) Development of the Alcohol Use  
580 Disorders Identification Test (AUDIT): WHO collaborative project on early detection of persons  
581 with harmful alcohol consumption - II. Addiction 88:791 – 804.

## Dopaminergic drug effects on probability weighting

- 582 Schonberg T, Fox CR, Poldrack RA (2011) Mind the gap: bridging economic and naturalistic risk-taking  
583 with cognitive neuroscience. *Trends Cogn Sci* 15:11–19.
- 584 Seeman P (2015) Parkinson’s disease treatment may cause impulse-control disorder via dopamine D3  
585 receptors. *Synapse* 69:183–189.
- 586 Sescousse G, Janssen LK, Hashemi MM, Timmer MHM, Geurts DEM, ter Huurne NP, Clark L, Cools R  
587 (2016) Amplified striatal responses to near-miss outcomes in pathological gamblers.  
588 *Neuropsychopharmacology* 41:2614–2623
- 589 Simon NW, Gilbert RJ, Mayse JD, Bizon JL, Setlow B (2009) Balancing risk and reward: a rat model of risky  
590 decision making. *Neuropsychopharmacology* 34:2208–2217.
- 591 St. Onge JR, Chiu YC, Floresco SB (2010) Differential effects of dopaminergic manipulations on risky  
592 choice. *Psychopharmacology*. 211:209–221.
- 593 St Onge JR, Floresco SB (2009) Dopaminergic modulation of risk-based decision making.  
594 *Neuropsychopharmacology* 34:681–697.
- 595 Stopper CM, Khayambashi S, Floresco SB (2013) Receptor-specific modulation of risk-based decision  
596 making by nucleus accumbens dopamine. *Neuropsychopharmacology* 38:715–728.
- 597 Takahashi H, Matsui H, Camerer CF, Takano H, Kodaka F, Ideno T, Okubo S, Takemura K, Arakawa R,  
598 Eguchi Y, Murai T, Okubo Y, Kato M, Ito H, Suhara T (2010) Dopamine D1 receptors and nonlinear  
599 probability weighting in risky choice. *J Neurosci* 30:16567–16572.
- 600 Timmer MHM, Sescousse G, Esselink RAJ, Piray P, Cools R (2017) Dopaminergic drugs decrease loss  
601 aversion in Parkinson’s disease with but not without depression. *Comput Psych* (in press).
- 602 Trepel C, Fox CR, Poldrack RA (2005) Prospect theory on the brain? Toward a cognitive neuroscience of  
603 decision under risk. *Cogn Brain Res* 23:34–50.
- 604 Van Der Schaaf ME, Van Schouwenburg MR, Geurts DEM, Schellekens AFA, Buitelaar JK, Verkes RJ, Cools  
605 R (2014) Establishing the dopamine dependency of human striatal signals during reward and  
606 punishment reversal learning. *Cereb Cortex* 24:633–642.
- 607 Van Holst RJ, Sescousse G, Janssen LK, Janssen M, Berry AS, Jagust WJ, Cools R (2017) Increased striatal  
608 dopamine synthesis capacity in gambling addiction. *Biol Psychiatry* 1–8.
- 609 Voon V, Fernagut PO, Wickens J, Baunez C, Rodriguez M, Pavon N, Juncos JL, Obeso JA, Bezard E (2009)  
610 Chronic dopaminergic stimulation in Parkinson’s disease: from dyskinesias to impulse control  
611 disorders. *Lancet Neurol* 8:1140–1149.
- 612 Voon V, Gao J, Brezing C, Symmonds M, Ekanayake V, Fernandez H, Dolan RJ, Hallett M (2011) Dopamine  
613 agonists and risk: impulse control disorders in Parkinson’s disease. *Brain* 134:1438–1446.

## Dopaminergic drug effects on probability weighting

- 614 Weber BJ, Chapman GB (2005) Playing for peanuts: why is risk seeking more common for low-stakes  
615 gambles? *Organ Behav Hum Decis Process* 97:31–46.
- 616 Zalocusky KA, Ramakrishnan C, Lerner TN, Davidson TJ, Knutson B, Deisseroth K (2016) Nucleus  
617 accumbens D2R cells signal prior outcomes and control risky decision-making. *Nature* 531:642–  
618 646.
- 619 Zeeb FD, Robbins TW, Winstanley CA (2009) Serotonergic and dopaminergic modulation of gambling  
620 behavior as assessed using a novel rat gambling task. *Neuropsychopharmacology* 34:2329–2343.
- 621 Zhong S, Israel S, Xue H, Sham PC, Ebstein RP, Chew SH (2009) A neurochemical approach to valuation  
622 sensitivity over gains and losses. *Proc R Soc London B Biol Sci* 276:4181–4188.
- 623 Zigmond AS, Snaith RP (1983) The Hospital Anxiety and Depression Scale. *Acta Psychiatr Scand* 67:361–  
624 370.

## Dopaminergic drug effects on probability weighting

### Figures and Tables

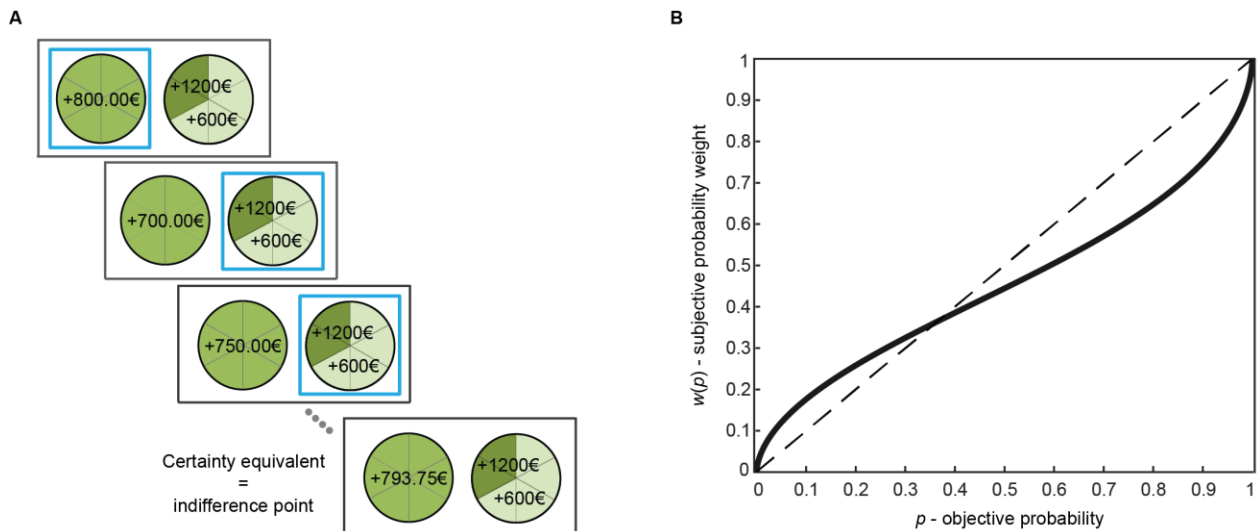

**Figure 1.** The gambling task and the probability weighting function of prospect theory. **A**, Each trial consisted of a self-paced choice between a sure option (on the left) and a risky gamble (on the right), followed by visual confirmation of the choice (a frame around the chosen option) and fixation. The sure amount in the next trial was adjusted based on the choice (increased if gamble was chosen, decreased if the sure option was chosen), with the gamble being fixed. After six choices, the sure amount that was reached provided an indifference point between the two options, defined as the ‘certainty equivalent’ of the gamble. A new series of choices involving a new gamble was then started (in total: 10 gambles in the gain domain and 10 gambles in the loss domain). No feedback was provided on the outcome of the choices. **B**, The solid black line represents a typical probability weighting function, with overweighting of low probabilities and underweighting of moderate to high probabilities. The dashed diagonal line represents neutrality with regard to sensitivity to probabilities.



## Dopaminergic drug effects on probability weighting

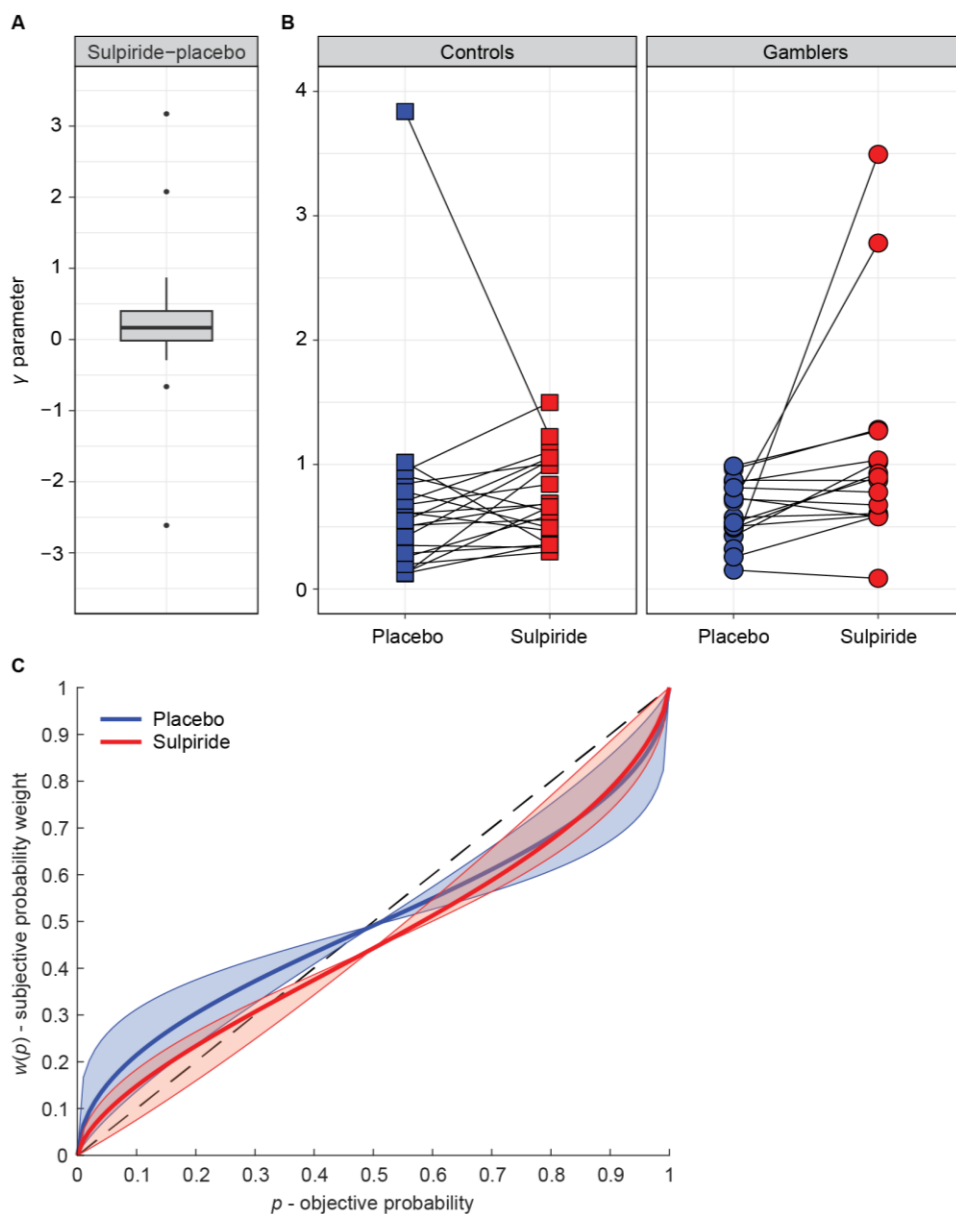

**Figure 2.** Dopaminergic modulation of probability distortion. **A**, Boxplot illustrating the drug effect (sulpiride-placebo) on the distortion parameter  $\gamma$  of the probability weighting function in the gain domain, across all participants. Box height represents the interquartile range (IQR), black line represents the median, and whiskers represent the largest and smallest values no further than  $1.5 \times \text{IQR}$ . Single data points are values located outside the whiskers. **B**, Within-subject paired observations of  $\gamma$  estimates in the placebo and sulpiride conditions for both experimental groups (different illustration of the result presented in Fig. 2A). **C**, Fitted probability weighting function, based on the median estimates of  $\delta$  (elevation) and  $\gamma$  (distortion) parameters across all participants. The shaded areas illustrate the variance of  $\gamma$  across participants, with the boundaries corresponding to the probability weighting function plotted with median  $\delta$ , and 25<sup>th</sup> and 75<sup>th</sup> percentile  $\gamma$ .

## Dopaminergic drug effects on probability weighting

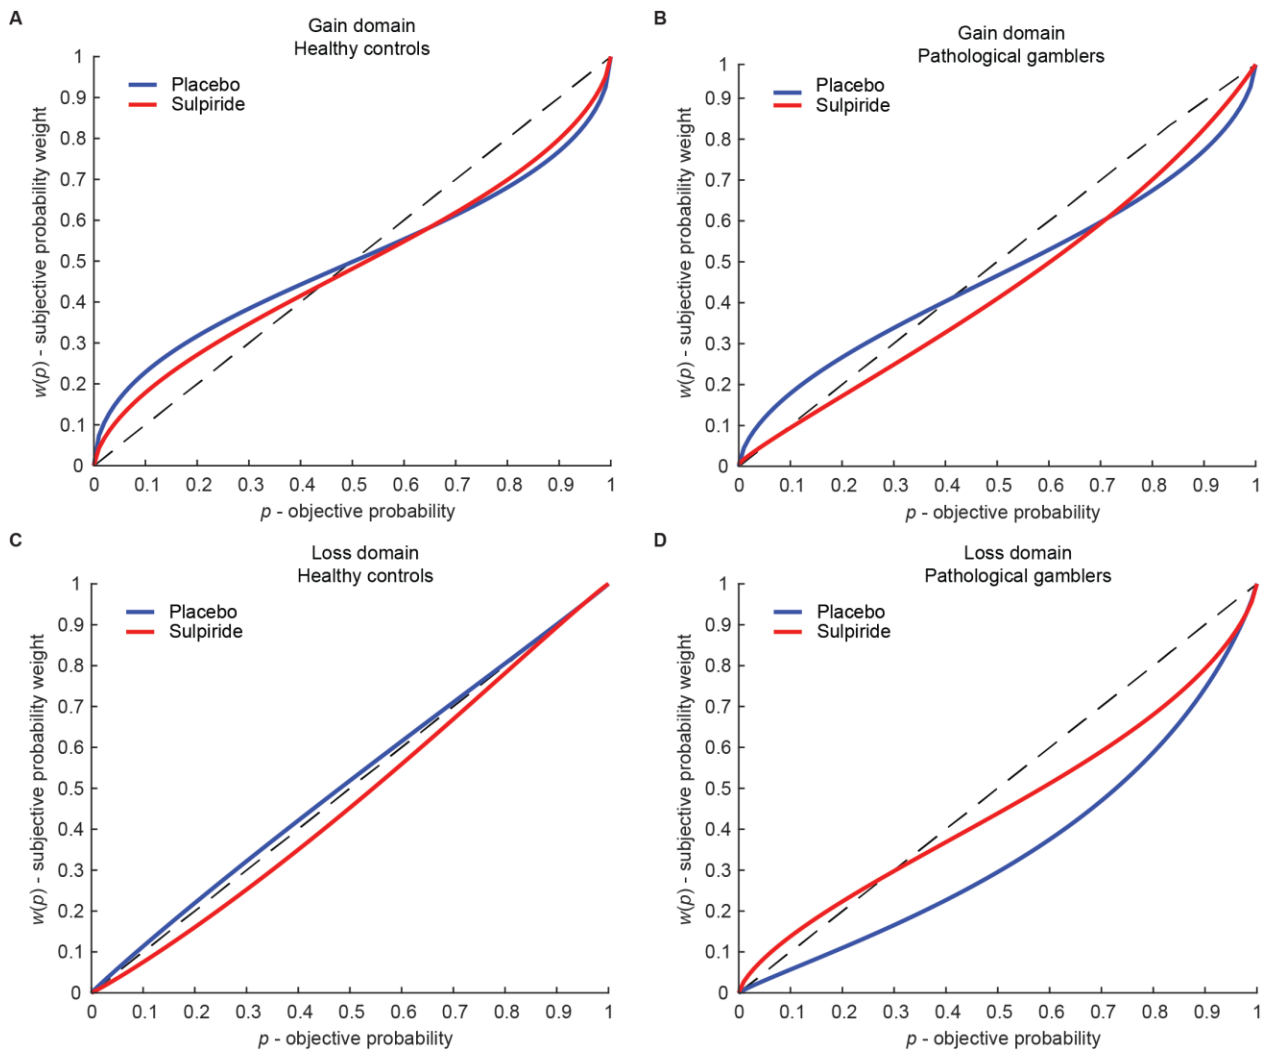

**Figure 3.** Fitted probability weighting function based on group median estimates of  $\delta$  (elevation) and  $\gamma$  (distortion). Across groups, sulpiride decreased probability distortion in the gain domain compared with placebo (panels **A**, **B**). When examining the placebo condition alone, pathological gamblers showed a decreased elevation of their probability weighting function in the loss domain compared with healthy controls (panels **C**, **D**).

## Dopaminergic drug effects on probability weighting

**Table 1. Demographic characteristics and questionnaire scores.**

| Variable                  | Healthy controls ( $n = 21$ ) |      |      | Pathological gamblers ( $n = 16$ ) |      |      | $p$   |
|---------------------------|-------------------------------|------|------|------------------------------------|------|------|-------|
|                           | Range                         | $M$  | $SD$ | Range                              | $M$  | $SD$ |       |
| Age                       | 18–52                         | 32.1 | 11.4 | 21–50                              | 35.8 | 8.8  | .29   |
| Net income (€)            | 0–3570                        | 1691 | 1123 | 750–3250                           | 1750 | 949  | .87   |
| Body mass index           | 18.3–30.9                     | 23.1 | 3.2  | 20.8–26.9                          | 23.9 | 2.0  | .38   |
| SOGS                      | 0–2                           | 0.2  | 0.5  | 6–18                               | 12.4 | 3.9  | <.001 |
| FTND                      | 0–5                           | 0.6  | 1.4  | 0–8                                | 2.5  | 2.9  | .014  |
| Number of current smokers | –                             | 10   | –    | –                                  | 10   | –    | .37   |
| AUDIT                     | 0–14                          | 6.2  | 3.8  | 0–15                               | 7.7  | 4.6  | .27   |
| HADS anxiety              | 0–12                          | 2.7  | 2.8  | 1–12                               | 4.9  | 3.4  | .035  |
| HADS depression           | 0–10                          | 1.6  | 2.3  | 0–15                               | 4.9  | 4.4  | .006  |
| Verbal IQ                 | 85–128                        | 106  | 9.5  | 77–123                             | 103  | 12.3 | .43   |

$M$  = Mean.  $SD$  = Standard Deviation. SOGS: South Oaks Gambling Screen; FTND: Fagerstrom Test for Nicotine Dependence (Heatherton et al., 1991); AUDIT: Alcohol Use Disorders Identification Test (Saunders et al., 1993); HADS: Hospital Anxiety and Depression Scale (HADS; Zigmond and Snaith, 1983).

**Table 2. Gambles with varying outcomes and probabilities.**

|     | Gamble index $i$ |      |     |      |     |      |      |      |      |      |
|-----|------------------|------|-----|------|-----|------|------|------|------|------|
|     | 1                | 2    | 3   | 4    | 5   | 6    | 7    | 8    | 9    | 10   |
| $x$ | 1200             | 1200 | 600 | 1200 | 600 | 1000 | 1200 | 1200 | 1200 | 1200 |
| $p$ | 1/6              | 2/6  | 2/6 | 2/6  | 2/6 | 2/6  | 2/6  | 3/6  | 4/6  | 5/6  |
| $y$ | 0                | 0    | 0   | 600  | 300 | 400  | 900  | 0    | 0    | 0    |

$x$  is the larger amount of money in the gamble that could be won or lost with probability  $p$ .  $y$  is the smaller amount of money in the gamble that could be won or lost with probability  $1-p$ .  $x$  and  $y$  are in €. For losses, the amounts of money were the same but negative.

## Dopaminergic drug effects on probability weighting

**Table 3. Estimates of prospect theory parameters.**

| Parameter                | Controls       |      |                  |      | Gamblers       |      |                  |      |
|--------------------------|----------------|------|------------------|------|----------------|------|------------------|------|
|                          | <u>Placebo</u> |      | <u>Sulpiride</u> |      | <u>Placebo</u> |      | <u>Sulpiride</u> |      |
|                          | Median         | IQR  | Median           | IQR  | Median         | IQR  | Median           | IQR  |
| $\alpha_{\text{gains}}$  | 0.74           | 0.66 | 0.80             | 0.42 | 0.80           | 0.37 | 1.16             | 0.81 |
| $\alpha_{\text{losses}}$ | 1.02           | 1.14 | 1.28             | 0.64 | 1.92           | 1.46 | 1.36             | 0.95 |
| $\delta_{\text{gains}}$  | 0.99           | 0.86 | 0.93             | 0.85 | 0.90           | 0.51 | 0.68             | 0.61 |
| $\delta_{\text{losses}}$ | 1.08           | 0.80 | 0.83             | 0.61 | 0.42           | 0.31 | 0.78             | 0.99 |
| $\gamma_{\text{gains}}$  | 0.55           | 0.50 | 0.66             | 0.54 | 0.64           | 0.35 | 0.89             | 0.49 |
| $\gamma_{\text{losses}}$ | 0.97           | 0.61 | 1.06             | 0.60 | 0.88           | 0.78 | 0.72             | 0.72 |

IQR = Interquartile range.

### Extended Data.

MATLAB code for the prospect theory parameter estimation procedure implemented in the study. The code includes scripts for the main parameter estimation, parameter recovery, and checking the quality of the estimation.
